# Supplementary material
Source: Elsevier journal article supplement (https://www.sciencedirect.com/science/article/pii/S0014256514003385)
Supplement: mmc1 [file S0014256514003385:mmc1.docx]

**La respuesta correcta es la 3: *Angiomatosis bacilar*.**

# La angiomatosis bacilar es una enfermedad infecciosa sistémica, presente en todo el mundo, en la que frecuentemente se afecta la piel. Suele presentarse como pápulas o nódulos, dispersa por todo el cuerpo, de apariencia vascular, de aspecto liso o costroso, y en ocasiones con linfadenopatías regionales. *Bartonella henselae* y *Bartonella quintana* son los agentes primarios de esta enfermedad, que afecta a pacientes con compromiso inmunitario, siendo especialmente frecuentes en pacientes infectados por el virus de inmunodeficiencia humana, con recuentos de linfocitos CD4 inferiores a 200 cél/mL.

El diagnóstico diferencial debe hacerse con otras lesiones de origen vascular, principalmente con el granuloma piógeno y el hemangioma epitelioide, con los que presenta semejanzas arquitecturales. En el diagnóstico de esta entidad es de importancia el hallazgo de acúmulos de neutrófilos fragmentados y el de material granular extracelular (Figura 1B; flechas amarillas), resultado de la acumulación de miríadas de microorganismos, lo que permite hacer el diagnóstico diferencial con las entidades mencionadas y con el Sarcoma de Kaposi, entre otras entidades. *Bartonella henselae* puede identificarse microscópicamente mediante la tinción de *Warthin-Starry* o PCR en sangre o tejido. La serología para *Bartonella henselae* es una alternativa más económica que las pruebas moleculares, con una sensibilidad del 95% y una especificidad del 98%.

En nuestro caso, tras establecer el diagnóstico de angiomatosis bacilar se detectó una infección por VIH-1, hasta entonces desconocida, con 178 cel/mL linfocitos CD4 y una carga viral de VIH-1 de 54.200 copias/mL.
